# Supplementary material for: Guanidyl-functionalized graphene as a bifunctional adsorbent for selective enrichment of phosphopeptides
Source: Royal Society of Chemistry journal article supplement (doi:10.1039/c4cc04327h), 2014-01-01
Supplement: c4cc04327h1.pdf [file c4cc04327h1.pdf]

## Supporting Information

# Guanidyl-Functionalized Graphene as a Bi-function Adsorbent for Selective Enrichment of Phosphopeptides

Lin-Nan Xu, Li-Ping Li, Liang Jin, Yu Bai\*, and Hu-Wei Liu

*Beijing National Laboratory for Molecular Sciences, Key Laboratory of Bioorganic Chemistry and Molecular Engineering of Ministry of Education, College of Chemistry and Molecular Engineering, Peking University, Beijing 100871, China. Tel: +86 10 6275 8198; E-mail: [yu.bai@pku.edu.cn](mailto:yu.bai@pku.edu.cn)*

## Experimental Section

### Materials

Graphene oxide (GO) was purchased from Nanjing XFNANO Materials Tech Co., Ltd. Thionyl chloride (SOCl<sub>2</sub>) was purchased from Sinopharm Chemical Reagent Co., Ltd. 1,6-hexanediamine, O-methylisourea hemisulfate (OMIU), and 2,5-dihydroxybenzoic acid (DHB) were purchased from J&K Scientific Ltd. N,N-dimethylformamide (DMF) was from J. T. Baker. Trypsin,  $\alpha$ -casein,  $\beta$ -casein, and acetonitrile (ACN) were purchased from Sigma-Aldrich. Ammonium bicarbonate (NH<sub>4</sub>HCO<sub>3</sub>) was purchased from Fluka. Trifluoroacetic acid (TFA) was obtained from Acros Organics. Acetic acid (HAc), phosphoric acid (H<sub>3</sub>PO<sub>4</sub>) and sodium hydroxide (NaOH) were from Beijing Chemical Works. Water used as solvent was from Wahaha Group Co., Ltd. Non-fat milk was purchased from a local supermarket.

### Preparation of amino- and guanidyl-functionalized graphene

#### Synthesis of amino-functionalized graphene (AFG)

120 mg GO, 30 mL SOCl<sub>2</sub>, and 1.5 mL DMF were mixed in a 100 mL flask. After sonification for sufficient dispersion of GO in solvent, the mixture was stirred at 70°C for 24 h. The acylated intermediate was separated from solution by centrifugation, washed with dry DMF and directly transferred into 30 mL 1,6-hexanediamine heated at 55°C. The mixture was stirred at 55°C for 48 h and then diluted with 25 mL ethanol. The product was washed with water and ethanol for several times and then dried under vacuum at room temperature.

#### Synthesis of guanidyl-functionalized graphene (GFG)

50 mg AFG, 3.0781 g OMIU, and 50 mL water were mixed in a 100 mL flask. After sonification for dispersion of AFG and dissolution of OMIU, the pH was adjusted to 11 by NaOH. The mixture was stirred at 60°C for 24 h and the reaction was terminated by adding

1.65 mL TFA. After washing by water and ethanol, the product was dried under vacuum at room temperature.

### **Preparation of $\alpha$ -casein, $\beta$ -casein, and non-fat milk digests**

$\alpha$ -casein and  $\beta$ -casein were dissolved in 50 mM  $\text{NH}_4\text{HCO}_3$  solution. After addition of trypsin with 1:40 (w/w) enzyme-to-protein ratio, the proteins were digested at 37°C for 20 h.

30  $\mu\text{L}$  non-fat milk was diluted with 970  $\mu\text{L}$  50 mM  $\text{NH}_4\text{HCO}_3$  solution. The diluent was centrifuged under 14,000 rpm for 25 min. After denaturation of the supernatant at 100°C for 5 min, 30  $\mu\text{g}$  trypsin was added and the mixture was allowed for digestion at 37°C for 20 h.

### **Enrichment of phosphopeptides**

In general, the tryptic digests were diluted with loading buffer (buffer A: 50% ACN, 0.1 M HAC; or buffer B: 66.6% ACN, 0.05% TFA) to a certain concentration, and the adsorbent (AFG or GFG) was dispersed in water by sonification. 50  $\mu\text{L}$  suspension of adsorbent (1 mg/mL-4 mg/mL) was added to 200  $\mu\text{L}$  peptide diluent, and the mixture was gently shaken by a rotator. After centrifugation and removal of the supernatant, the adsorbent was washed by 100  $\mu\text{L}$  loading buffer for three times and mixed with 5  $\mu\text{L}$  matrix solution of ACN/H<sub>2</sub>O 1:1 (v/v) containing 30 mg/mL DHB and 5% H<sub>3</sub>PO<sub>4</sub>.

### **Instrumentation**

Infrared spectrum was measured with KBr pellet by Bruker Tensor 27 FT-IR. Absorbance spectrum was acquired with resolution of 4  $\text{cm}^{-1}$  and subtraction of background of air. Average spectrum of 32-time measurements was recorded.

Elemental composition was analyzed by Vario EL from Elementar Analysensysteme GmbH to acquire the content of C, H, N in weight

For TEM analyses, drops of dispersion of materials were deposited on 200 mesh copper grids equipped with micro-grids and coated with ultrathin carbon film and dried in air. The morphology of samples were observed by FEI Tecnai G2 T20 TEM operated at 120 kV.

MALDI-TOF MS spectra were acquired by a Bruker Daltonics ultraflex TOF mass spectrometer. Reflection mode was adopted and voltage parameters were set as followed in our work: ion source 1, 25.00 kV; ion source 2, 22.15 kV; lens, 10.55 kV; reflector, 26.30 kV; reflector 2, 14.10 kV. The laser frequency was set on 20 Hz. 1  $\mu\text{L}$  of mixture of materials with peptides adsorbed and matrix solution was directly deposited on a plate and dried in air for MALDI-TOF MS analysis.

**Figure and Table**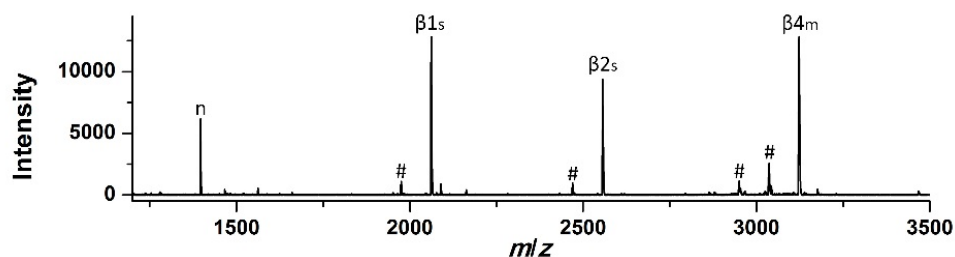

**Figure S1** Enrichment of phosphopeptides from digest of  $\beta$ -casein at  $4 \times 10^{-7}$  M by AFG. Composition of loading buffer is 60% ACN with 0.1 M HAc. (s: monophosphopeptide; m: multiphosphopeptide; #: dephosphorylated residue of phosphopeptides; n: non-phosphorylated peptide).

**Table S1** Detailed informations of phosphopeptides enriched from digests of  $\alpha$ -casein,  $\beta$ -casein and non-fat milk

| No.         | <i>m/z</i> | phosphorylation sites | Sequences                      |
|-------------|------------|-----------------------|--------------------------------|
| $\alpha$ 1  | 1237.0     | 1                     | TVDMEpSTEVF                    |
| $\alpha$ 2  | 1661.0     | 1                     | VPQLEIVPNpSAEER                |
| $\alpha$ 3  | 1927.2     | 2                     | DIGpSEpSTEDQAMEDIK             |
| $\alpha$ 4  | 1943.1     | 2                     | DIGpSEpSTEDQAoMEDIK            |
| $\alpha$ 5  | 1952.3     | 1                     | YKVPQLEIVPNpSAEER              |
| $\alpha$ 6  | 2618.1     | 4                     | NTMEHVpSpSpSEESIIpSQETYK       |
| $\alpha$ 7  | 2635.1     | 4                     | NToMEHVpSpSpSEESIIpSQETYK      |
| $\alpha$ 8  | 2677.3     | 3                     | VNELpSKDIGpSEpSTEDQAMEDIK      |
| $\alpha$ 9  | 2703.3     | 5                     | pyroQMEAEpSIpSpSpSEEIVPNpSVEQK |
| $\alpha$ 10 | 2719.5     | 5                     | QMEAEpSIpSpSpSEEIVPNpSVEQK     |
| $\alpha$ 11 | 2735.3     | 5                     | QoMEAEpSIpSpSpSEEIVPNpSVEQK    |
| $\alpha$ 12 | 2935.0     | 3                     | EKVNELpSKDIGpSEpSTEDQAMEDIK    |
| $\alpha$ 13 | 3007.8     | 4                     | NANEEYpSIGpSpSpSEESAEEVATEEVK  |
| $\alpha$ 14 | 3087.7     | 5                     | NANEEYpSIGpSpSpSEEpSAEVATEEVK  |
| $\beta$ 1   | 2061.6     | 1                     | FQpSEEQQTEDELQDK               |
| $\beta$ 2   | 2555.9     | 1                     | FQpSEEQQTEDELQDKIHFP           |
| $\beta$ 3   | 2965.8     | 4                     | ELEELNVPGEIVEpSLpSpSpSEESITR   |
| $\beta$ 4   | 3122.1     | 4                     | RELEELNVPGEIVEpSLpSpSpSEESITR  |
